# Supplementary material
Source: PubMed Central journal article supplement (PMC2708939)
Supplement: NIHMS102826-supplement-supplementary_figure_1.pdf [file NIHMS102826-supplement-supplementary_figure_1.pdf]

## **SUPPORTING INFORMATION**

### **Figure S1. Sca 1<sup>+</sup> population among single cell EMT6 isolates and parental cells.**

Cell populations that arose from single cells were seeded onto cell culture dishes ( $1 \times 10^6$  cells/100 mm dish) and harvested non-enzymatically in a cell dissociation solution (from Mediatech, Inc.) after 48 hours. Harvested cells were fixed overnight with 4% paraformaldehyde at 4C°, washed with PBS containing 1% fetal bovine serum that was free of Ca<sup>2+</sup> and Mg<sup>2+</sup> and the washed cells blocked with anti-mouse CD16/CD32 (mouse BD Fc Block™) to avoid nonspecific binding of antibodies. FITC conjugated anti-mouse Sca1 antibody was used to stain each cell line. Control isotype antibodies which have no specificity for Sca1 were used as a negative control. Sca1 stained cell populations were analyzed by flow cytometry using a FACS Calibur 2 Sorter (Beckton Dickinson) and the number of cells in each phase of the cell cycle quantitated by FlowJo (Tree Star, Inc.) as indicated in each panel of the figure.

## Supplementary Figure 1.

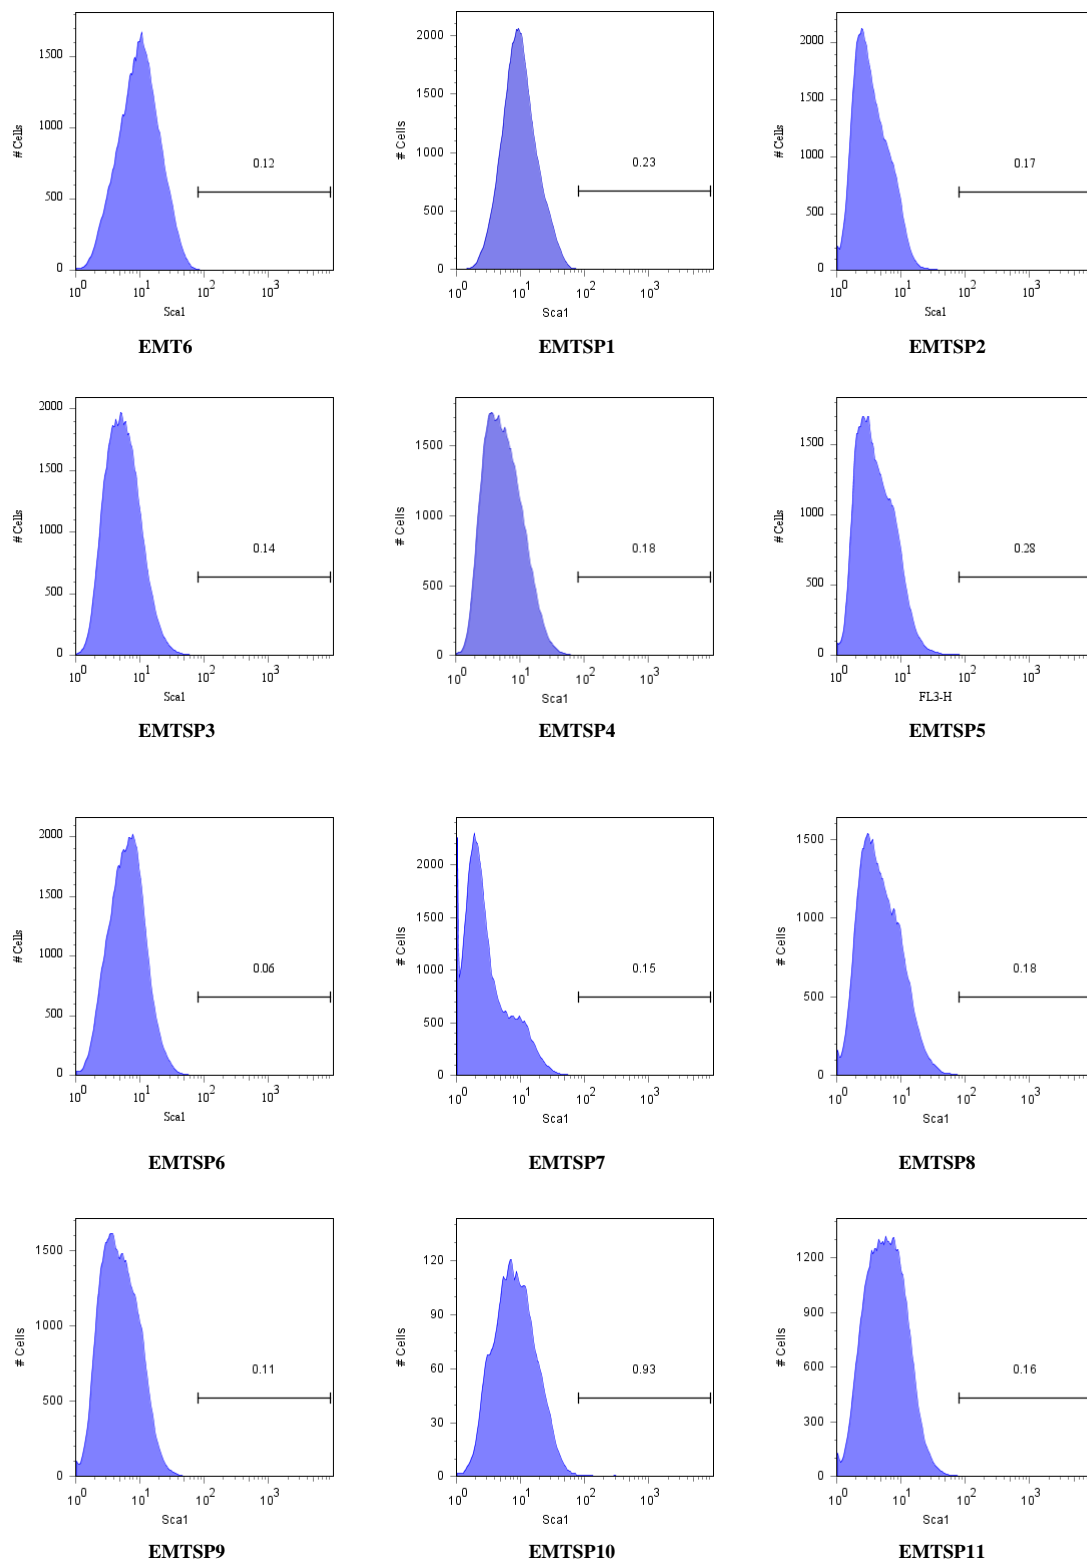

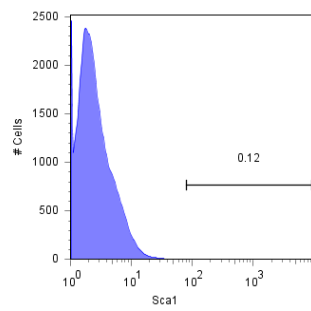

**EMTSP12**
